# Supplementary material for: A terpyridyl-imidazole based europium tris-(β-diketonate) complex as an efficient molecular luminescent thermometer and single component white light emitter via synergy in energy transfer between ligands and Eu3+
Source: Royal Society of Chemistry journal article supplement (doi:10.1039/d3dt03837h), 2024-01-01
Supplement: d3dt03837h1.pdf [file d3dt03837h1.pdf]

## **Electronic Supplementary Information**

**Terpyridyl-imidazole based europium tris-( $\beta$ -diketonate) complex as efficient molecular luminescent thermometer and single component white light emitter via synergy in energy transfer between ligand and  $\text{Eu}^{3+}$**

**Toushique Ahmed, Amit Chakraborty, Sanchari Maity and Sujoy Baitalik\***

---

\* *To whom correspondence should be addressed. Department of Chemistry, Inorganic Chemistry Section, Jadavpur University, Kolkata 700032, India. E-mail: sbaitalik@hotmail.com and sujoy.baitalik@jadavpuruniversity.in; Tel: +913324146666.*

## Experimental section

### Materials

2-theonyltrifluoroacetone (Htta) and europium chloride or nitrate salts were purchased from Merck as their hexa- or pentahydrated forms and used as received. Solvents were dried and distilled following the standard procedure. 4'-(*p*-formylphenyl)-2,2':6',2''-terpyridine (tpy-PhCHO) and 9,10-phenanthrene-9,10-dione were synthesized by following reported literature method.<sup>S1-S4</sup>

### Instruments and physical methods

UV-vis absorption spectra of the complexes were recorded with a Shimadzu UV 1800 spectrophotometer. Steady-state luminescence spectra were obtained by a Horiba Fluoromax-4 spectrofluorimeter with a photomultiplier tube (PMT). Luminescence lifetime measurements were carried out by using time-correlated single photon counting (TCSPC) as well as multi-channel scaling (MCS) setup from Horiba (Deltaflex) with a TBX Picosecond Photon Detection Module and the luminescence decay data were analyzed by using Eztime software. Spectrophotometric studies were carried out with the compounds with concentrations of  $\sim 10^{-5}$  M. The Diffuse Reflectance Spectroscopic (DRS) measurements of the samples were collected from a Shimadzu-3600 UV-Vis-NIR spectrophotometer. Barium sulfate powder was used as the reflectance standard during the DRS measurements.

[Experimental uncertainties are as follows: absorption maxima,  $\pm 2$  nm; molar absorption coefficients, 10%; emission maxima,  $\pm 5$  nm; excited-state lifetimes, 10%; luminescence quantum yields, 10%.]

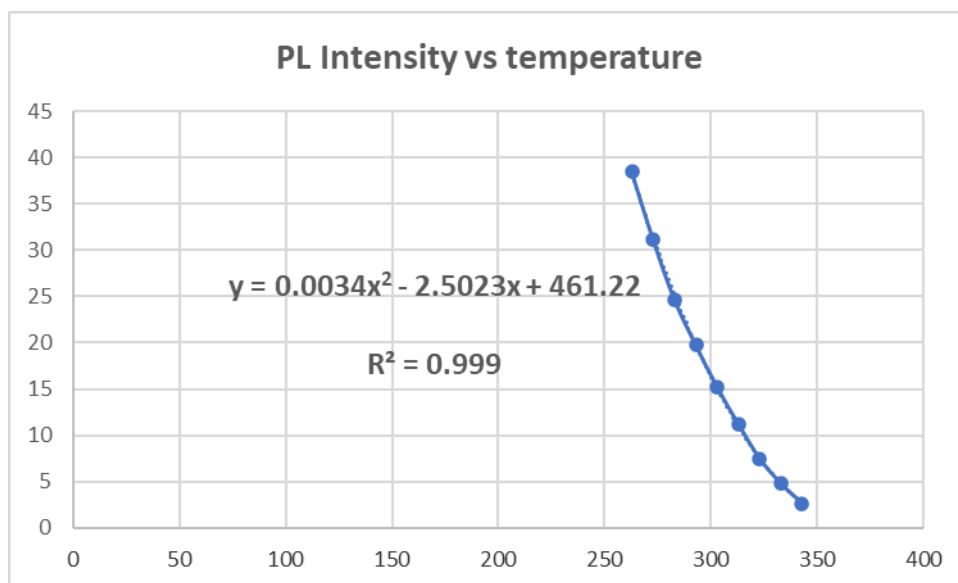

**Fig. S1** Change in photoluminescence intensity ratio with varying temperature from 273-343K. The dotted line indicates the best-fitted curve.

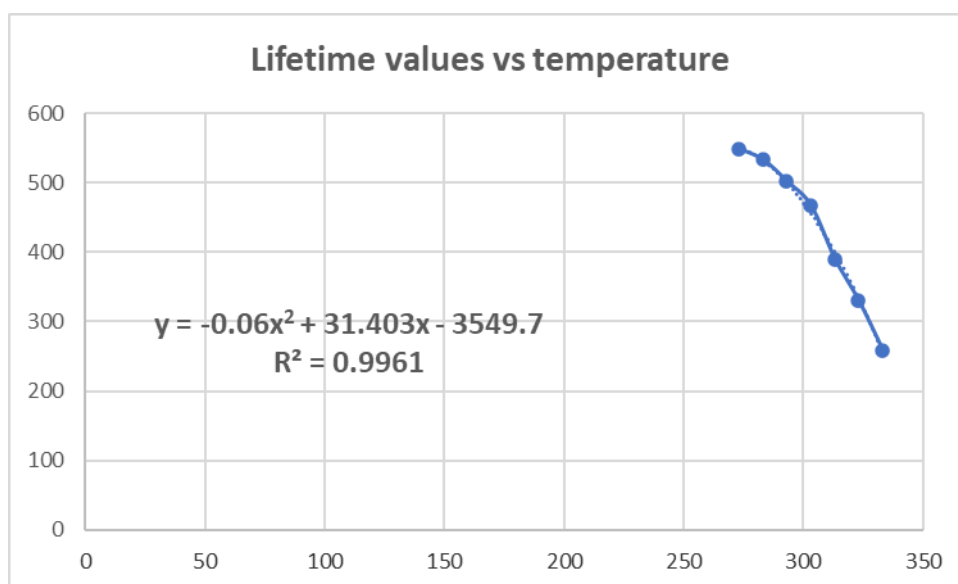

**Fig. S2** Change in lifetime values with varying temperature from 273-343K. The dotted line indicates the best-fitted curve.

**Table S1.** Comparative study of some earlier reported lanthanide ( $\beta$ -diketonate) complexes.

| Complex                                                                                                                | $S_r$ (%K <sup>-1</sup> )                                   | Temp. range     | Ref. |
|------------------------------------------------------------------------------------------------------------------------|-------------------------------------------------------------|-----------------|------|
| [Eu(tta) <sub>3</sub> (pyphen)]; tta= thenoyltrifluoroacetone and pyphen= pyrazino[2,3-f][1,10]phenanthroline          | 1.68 (323 K)                                                | 283–323 K       | 63   |
| Eu(CPDK3-5) <sub>3</sub> phen; CPDK3-5 =1-(4-(4-propylcyclohexyl)phenyl)octane-1,3-dione and phen=1,10-phenanthroline  | 2.2% to 1.5% K <sup>-1</sup>                                | 298-348 K       | 64   |
| Eu(L) <sub>3</sub> ; L= 1,3-di(thienyl)propane-1,3-diones                                                              | 0.65%                                                       | 100K < T < 400K | 65   |
| Eu-DT; DT= Dinaphthoilmethane (DNM) and trioctylphosphine oxide                                                        | 2.2%                                                        | 298-318 K       | 66   |
| [CHOL][Eu(FOD) <sub>4</sub> ]; CHOL=choline and FOD= tetrakis-1,1,1,2,2,3,3-heptafluoro-7,7-dimethyloctane-4,6-dionate | 0.45% C -1 at 25 °C, with an increase to 7.0 % C-1 at 95 °C | 298-368         | 67   |

**Table S2.** Solvatochromic emission spectral parameters of Eu(tta)<sub>3</sub>(tpy-HImdzphen) at RT.

| Solvents          | $\lambda_{em}$ , nm<br>(Ligand-centered) | $\lambda_{em}$ , nm<br>(Eu <sup>3+</sup> -centered) | $\tau$ , $\mu$ s<br>( $\lambda_{em}=614$<br>nm) | CIE colour coordinates |      |
|-------------------|------------------------------------------|-----------------------------------------------------|-------------------------------------------------|------------------------|------|
|                   |                                          |                                                     |                                                 | x                      | y    |
| Toluene           | 433                                      | 579, 593, 614, 652                                  | 561                                             | 0.35                   | 0.17 |
| Chloroform        | 447                                      | do                                                  | 381                                             | 0.20                   | 0.12 |
| Dichloromethane   | 443                                      | do                                                  | 507                                             | 0.37                   | 0.21 |
| Acetone           | 460                                      | do                                                  | 588                                             | 0.18                   | 0.16 |
| Ethyl acetate     | 444                                      | do                                                  | 306                                             | 0.18                   | 0.10 |
| Dimethylsulfoxide | 478                                      | do                                                  | 641                                             | 0.20                   | 0.27 |
| Acetonitrile      | 465                                      | do                                                  | 581                                             | 0.35                   | 0.26 |
| Ethanol           | 460                                      | do                                                  | 318                                             | 0.17                   | 0.20 |
| Methanol          | 490                                      | do                                                  | 193                                             | 0.24                   | 0.33 |

The intrinsic quantum yield ( $\Phi_{ff}$ ), the energy transfer efficiency of the ligand tpy-Hlmzphen ( $\eta_{sens}$ ), radiative ( $k_r$ ) and non-radiative ( $k_{nr}$ ) rate constants were calculated using the following equations<sup>71</sup>:

$$k_r = A_{MD,0} n^3 \left( \frac{I_{tot}}{I_{MD}} \right)$$

$$\tau_{rad} = \frac{1}{k_r}$$

$$k_{nr} = \frac{1}{\tau_{obs}} - \frac{1}{\tau_{rad}}$$

$$\tau_{obs} = \frac{1}{k_r + k_{nr}}$$

$$\Phi_{ff} = \frac{k_r}{k_r + k_{nr}} = \frac{\tau_{obs}}{\tau_{rad}}$$

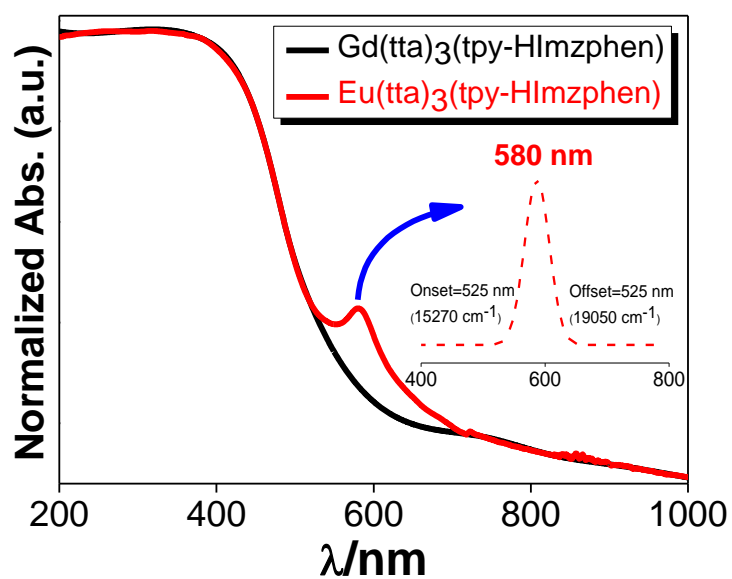

**Fig. S3** UV-diffuse reflectance spectra (DRS) for the LMCT state.

## References:

S1. K. T. Pott, D.A. Usifer and H. D. Abruna, *J. Am. Chem. Soc.*, 1987, **109**, 3961.

S2. F. H. Case and T. J. Kaspen, *J. Am. Chem. Soc.*, 1956, **78**, 5842.

S3. W. Spahni and G. Helv. Calzaferri, *Helv. Chim. Acta*, 1984, **67**, 450.

S4. E. C. Constable, M. D. Ward and S. Corr, *Inorg. Chim. Acta*, 1988, **141**, 201.
